# Supplementary material for: Transferrin receptor 1 is a cellular receptor for human heme-albumin
Source: PubMed Central journal article supplement (PMC7591885; doi:10.1038/s42003-020-01294-5), 2020-10-27
Supplement: 42003_2020_1294_MOESM2_ESM.pdf [file 42003_2020_1294_MOESM2_ESM.pdf]

## **Description of Additional Supplementary Files**

File Name: Supplementary Data 1

Description: The source data behind graphs
